# Supplementary material for: Suppression of PPARγ-mediated monoacylglycerol O-acyltransferase 1 expression ameliorates alcoholic hepatic steatosis
Source: PubMed Central journal article supplement (PMC4941543; doi:10.1038/srep29352), 2016-07-11
Supplement: srep29352-s1.pdf [file srep29352-s1.pdf]

## Supplementary Information

### Suppression of PPAR $\gamma$ -mediated monoacylglycerol O-acyltransferase 1 expression ameliorates alcoholic hepatic steatosis

Jung Hwan Yu, Su Jin Song, Ara Kim, Yoonjeong Choi, Jo Woon Seok, Hyo Jung Kim, Yoo Jeong Lee, Kwan Sik Lee, Jae-woo Kim

Contents : Supplementary Figures and Legends (Figure S1-S4)

#### Supplementary Figure S1

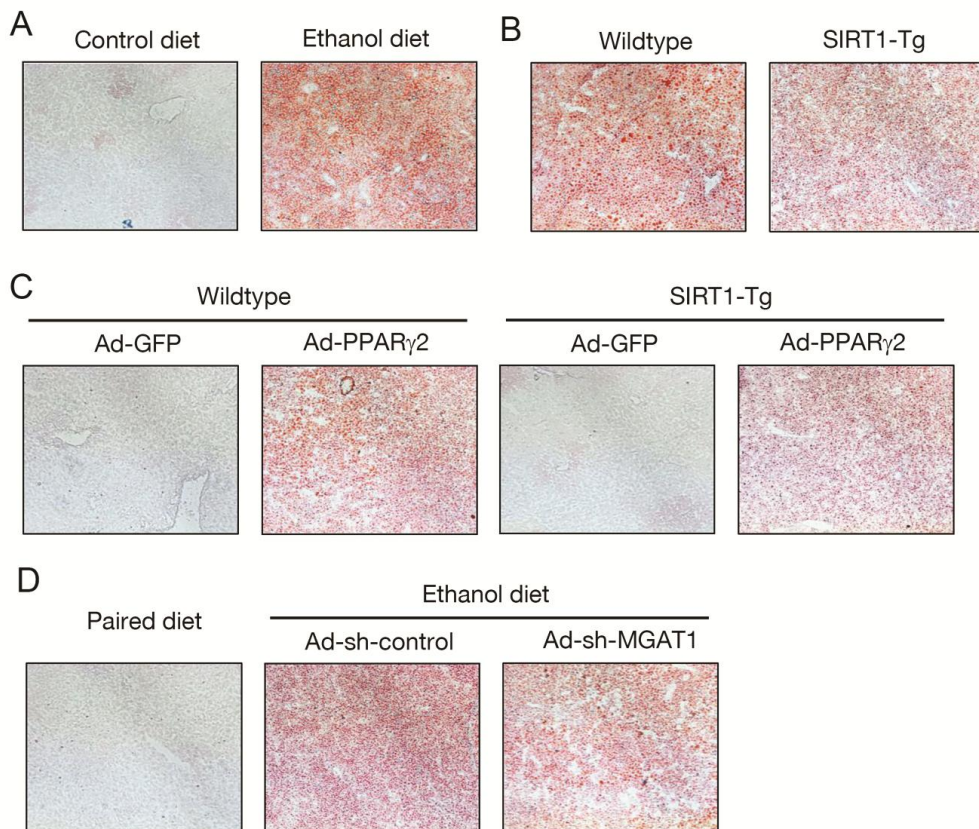

**Supplementary Figure S1. Oil-red-O staining performed on liver sections.** (A) Oil-red-O staining in control and ethanol diet-fed mice. Related to Fig. 1b. (B) Oil-red-O staining in wild type and SIRT1 transgenic mice after ethanol diet. Related to Fig. 2a. (C) Oil-red-O staining performed on liver sections of wild type and SIRT1 transgenic mice after Ad-GFP or Ad-PPAR $\gamma$ 2. Related to Fig. 4b. (D) Oil-red-O staining performed on liver sections from mice in paired, ethanol-fed with sh-control, and ethanol-fed with sh-MGAT1 groups. Related to Fig. 5b.

## Supplementary Figure S2

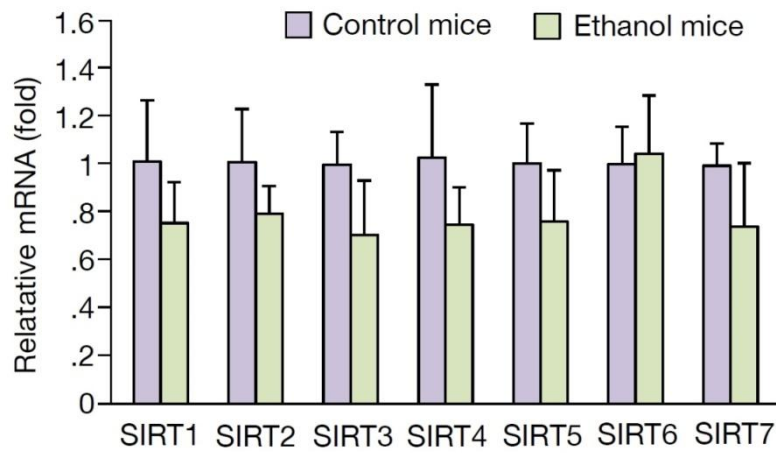

**Supplementary Figure S2. mRNA expression levels of sirtuin subtypes in alcohol-fed mice.** Expression levels of currently known sirtuin subtypes in the liver of control diet and ethanol-fed mice (n = 6 per group). The mRNA expression levels of all sirtuin types were generally reduced in the ethanol-fed group. Data represent the mean  $\pm$  SD. \*P < 0.05, \*\*P < 0.01.

### Supplementary Figure S3

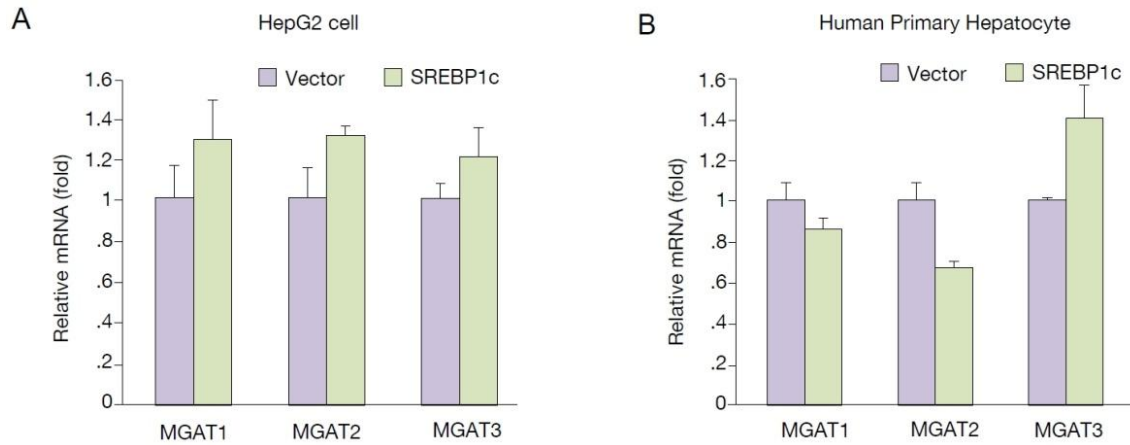

**Supplementary Figure S3. Expression patterns of MGAT subtypes in response to SREBP1c overexpression.** (A, B) HepG2 cells ( $4 \times 10^5$  cells per well) cultured on 6-well plates or human primary hepatocytes ( $1 \times 10^6$  cells per well) were transfected with SREBP1c expression vector or control vector using Lipofectamine 2000 reagent. After 24 h, the media was replaced with 10% FBS-DMEM. After 48 h, total RNA was isolated and analyzed by real-time qPCR. Data represent the mean  $\pm$  SD.

## Supplementary Figure S4

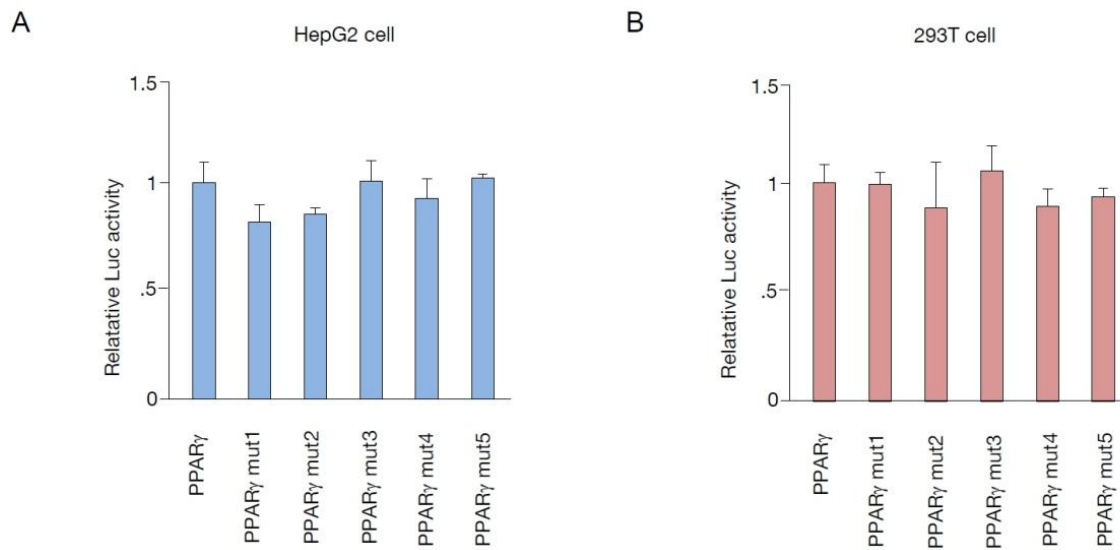

**Supplementary Figure S4. Luciferase assay to evaluate the acetylation sites that modulate PPAR $\gamma$ 2-induced MGAT1 expression.** Luciferase assay using mouse MGAT promoters (~2 kb) was performed. Promoter activity was determined by examining the relative luciferase activity in (A) HepG2 cells or (B) 293T cells. MGAT promoter constructs were co-transfected with each PPAR $\gamma$ 2 mutant using Lipofectamine 2000 reagent. Data represent the mean  $\pm$  SD from three independent experiments performed in duplicate.
